# Supplementary material
Source: publisher site journal article supplement (https://www.spandidos-publications.com/5300/downloadSupplementary)
Supplement: Supplementary file 1 [file downloadSupplementary]

Table SI. List of siRNA and quantitative PCR primer sequences used in the study.

| A, siRNA        |                             |
|-----------------|-----------------------------|
| Name/direction  | Sequence                    |
| ATP6V1B1_#1     |                             |
| Sense           | 5'-GACAACUUCGCCAUCGUCU-3'   |
| Antisense       | 5'-AGACGAUGGCGAAGUUGU-3'    |
| ATP6V1B1_#2     |                             |
| Sense           | 5'-CAGACUUGACGGGCUUCAU-3'   |
| Antisense       | 5'-AUGAAGCCCGUCAAGUCUG-3'   |
| B, qPCR primers |                             |
| Gene/direction  | Sequence                    |
| ATP6V1B1        |                             |
| Fw              | 5'-CAGCAGGCTCAGACACTGG-3'   |
| Rev             | 5'-CCCAGGCCTGCTGTCTATCTC-3' |
| Cyclin D1       |                             |
| Fw              | 5'-CCGTCCATGCGGAAGATC-3'    |
| Rev             | 5'-ATGGCCAGCGGAAGAC-3'      |
| p21             |                             |
| Fw              | 5'-AGTCAGTTCCTTGTGGAGCC-3'  |
| Rev             | 5'-CATTAGCGCATCACAGTCGC-3'  |
| GAPDH           |                             |
| Fw              | 5'-AGAAGGCTGGGGCTCATTTG-3'  |
| Rev             | 5'-AGGGGCCATCCACAGTCTTC-3'  |

AccuTarget Negative Control siRNAs, catalogue no. SN-1013 (Bioneer Corporation). Fw, forward; Rev, reverse; siRNA, small interfering RNA; ATP6V1B1, ATPase H<sup>+</sup> transporting V1 subunit B1.

Table SII. Average age of the patients included in the study.

| Group      | Age, years  |
|------------|-------------|
| Normal     | 49.12±16.45 |
| Benign     | 43.66±13.89 |
| Borderline | 43.23±17.44 |
| Cancer     | 52.13±13.08 |

Values are expressed as the mean ± standard deviation
